# Supplementary material for: Genomic Identification, Evolution and Sequence Analysis of the Heat-Shock Protein Gene Family in Buffalo
Source: MDPI journal article supplement (doi:10.3390/genes11111388), 2020-11-23
Supplement: s1 [file s1]

# Genomic Identification, Evolution and Sequence Analysis of the Heat-Shock Protein Gene Family in Buffalo

Saif ur Rehman <sup>1,†</sup>, Asif Nadeem <sup>2,†</sup>, Maryam Javed <sup>3</sup>, Faiz-ul Hassan <sup>4,\*</sup>, Xier Luo <sup>1</sup>, Ruqayya Bint Khalid <sup>3</sup> and Qingyou Liu <sup>1,\*</sup>

<sup>1</sup> State Key Laboratory for Conservation and Utilization of Subtropical Agro-Bioresources, Guangxi University, Nanning, Guangxi, 530005, China; saif\_ali28@yahoo.com (S.u.R.); luoxier92@163.com (X.L.)

<sup>2</sup> Department of Biotechnology, Virtual University of Pakistan, Lahore-54000, Pakistan; asif.nadeem@vu.edu.pk (A.N.)

<sup>3</sup> Institute of Biochemistry and Biotechnology, University of Veterinary and Animal Sciences, Lahore, Pakistan; Maryam.javed@uvas.edu.pk (M.J.); ruqiakhalid0@gmail.com (R.B.K.)

<sup>4</sup> Institute of Animal and Dairy Sciences, Faculty of Animal Husbandry, University of Agriculture, Faisalabad-38040, Pakistan

\* Correspondence: f.hassan@uaf.edu.pk (F.-u.H.); qyliu-gene@gxu.edu.cn (Q.L.); Tel.: +86-138-7880-5296 (Q.L.)

† These authors contributed equally to this manuscript.

Received: 26 October 2020; Accepted: 18 November 2020; Published: 23 November 2020

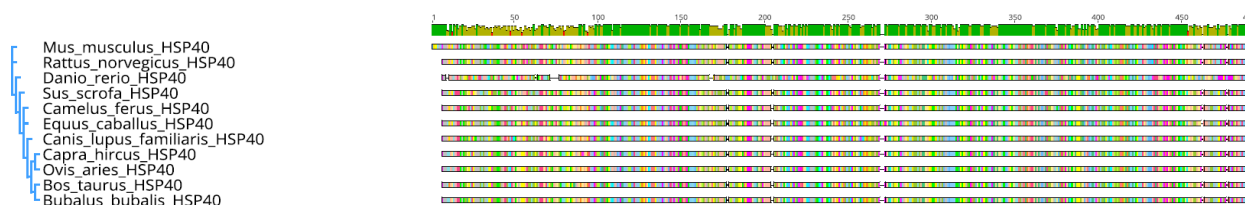

**Figure S1.** Tree with alignment view of HSP40. Percentage of sequence is represented with different colors in Identity bar at top of the sequences green color indicates 100% identity, green-brown shows at least 30 and under 100% while red representing below 30 identity.

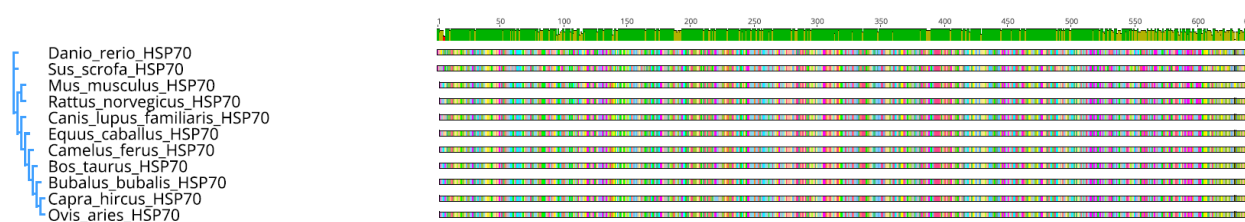

**Figure S2.** Tree with alignment view of HSP70. Percentage of sequence is represented with different colors in Identity bar at top of the sequences green color indicates 100% identity, green-brown shows at least 30 and under 100% while red representing below 30 identity.

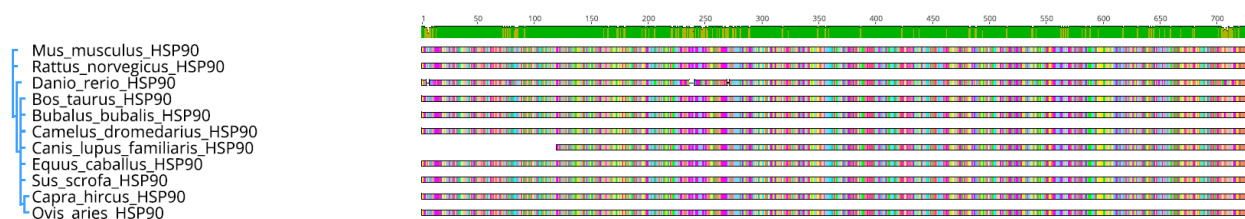

**Figure S3.** Tree with alignment view of HSP90. Percentage of sequence is represented with different colors in Identity bar at top of the sequences green color indicates 100% identity, green-brown shows at least 30 and under 100% while red representing below 30 identity.

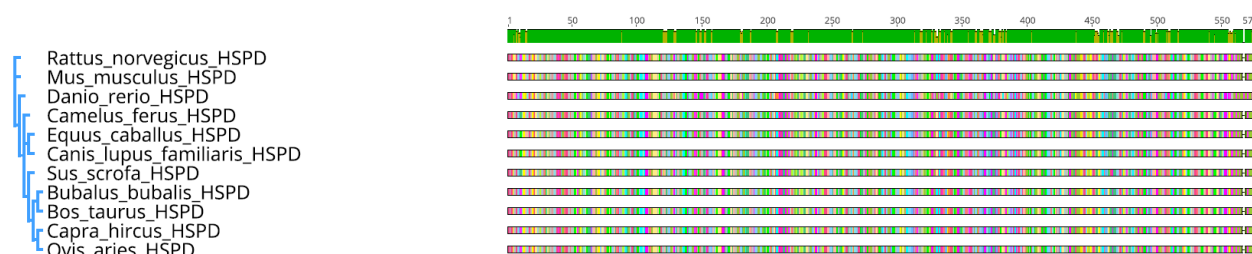

**Figure S4.** Tree with alignment view of HSPD. Percentage of sequence is represented with different colors in Identity bar at top of the sequences green color indicates 100% identity, green-brown shows at least 30 and under 100% while red representing below 30 identity.

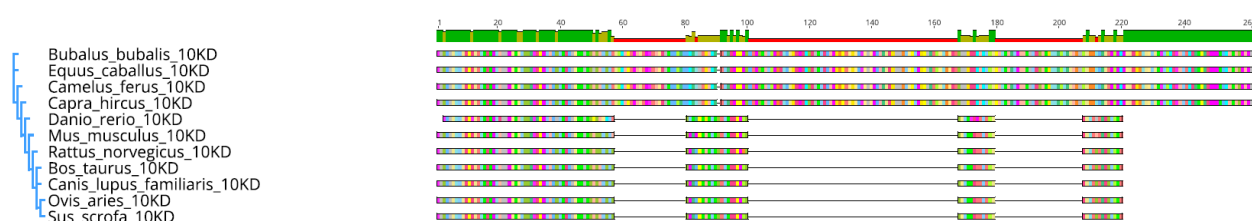

**Figure S5.** Tree with alignment view of HSP10. Percentage of sequence is represented with different colors in Identity bar at top of the sequences green color indicates 100% identity, green-brown shows at least 30 and under 100% while red representing below 30 identity.

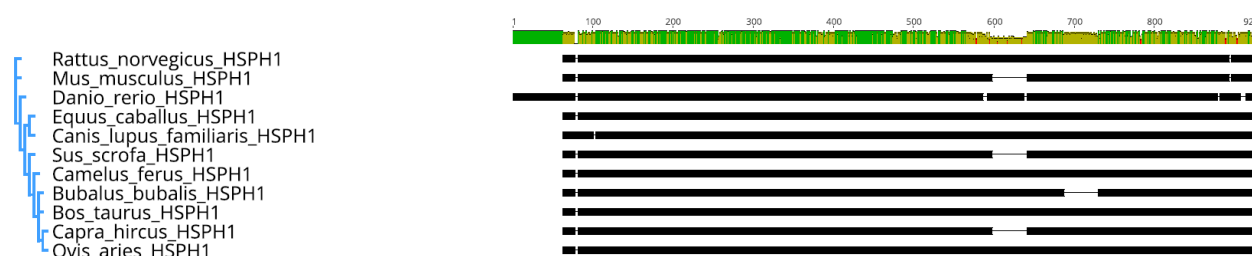

**Figure S6.** Tree with alignment view of HSPH1. Percentage of sequence is represented with different colors in Identity bar at top of the sequences green color indicates 100% identity, green-brown shows at least 30 and under 100% while red representing below 30 identity.

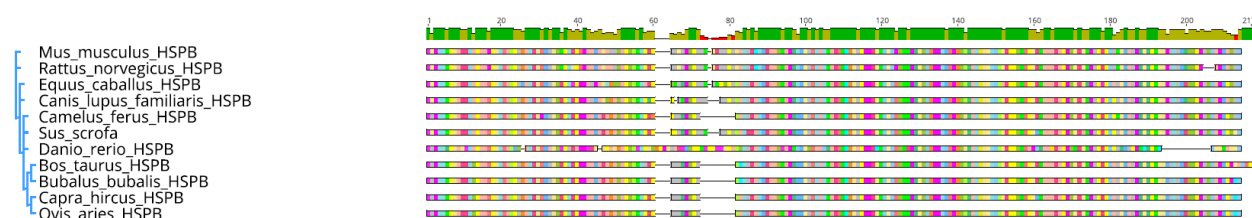

**Figure S7.** Tree with alignment view of HSPB. Percentage of sequence is represented with different colors in Identity bar at top of the sequences green color indicates 100% identity, green-brown shows at least 30 and under 100% while red representing below 30 identity.

**Table S1.** Accession no. of different heat shock protein in different organisms used in phylogenetic analysis

| Sr. No. | HSP Gene                     | Accession No.     |
|---------|------------------------------|-------------------|
| 1       | Capra hircus HSP10           | XP_017916787.1    |
| 2       | Ovis aries HSP10             | XP_027820863.1 10 |
| 3       | Equus caballus HSP10         | XP_023478058.1    |
| 4       | Bos taurus HSP10             | NP_776771.1 10    |
| 5       | Bubalus bubalis HSP10        | XP_025133715.1    |
| 6       | Camelus ferus HSP10          | XP_006175275.2    |
| 7       | Sus scrofa HSP10             | NP_999472.1       |
| 8       | Canis lupus familiaris HSP10 | XP_852207.1 10    |
| 9       | Mus musculus HSP10           | NP_032329.1       |
| 10      | Rattus norvegicus HSP10      | NP_037098.1 10    |
| 11      | Danio rerio HSP10            | NP_001315319.1 10 |
| 12      | Capra hircus HSP40           | XP_005697986.3    |
| 13      | Ovis aries HSP40             | XP_014959545.1    |
| 14      | Equus caballus HSP40         | XP_014585675.1    |
| 15      | Bos Taurus HSP40             | XP_005224490.1    |
| 16      | Bubalus bubalis HSP40        | XP_006054938.1    |
| 17      | Camelus ferus HSP40          | XP_032317011.1    |
| 18      | Sus scrofa HSP40             | XP_003354675.1    |
| 19      | Canis lupus familiaris HSP40 | XP_851751.1       |
| 20      | Mus musculus HSP40           | EDK97241.1        |
| 21      | Rattus norvegicus HSP40      | NP_001033684.1    |
| 22      | Danio rerio HSP40            | AAH55555.1        |
| 23      | Capra hircus HSP70           | NP_001272632.1    |
| 24      | Ovis aries HSP70             | AEX55801.1        |
| 25      | Equus caballus HSP70         | NP_001243852.1    |
| 26      | Bos taurus HSP70             | NP_976067.3       |
| 27      | Bubalus bubalis HSP70        | XP_006041955.2    |
| 28      | Camelus ferus HSP70          | XP_032318576.1    |
| 29      | Sus scrofa HSP70             | NP_001116599.1    |
| 30      | Canis lupus familiaris HSP70 | NP_001003067.2    |
| 31      | Mus musculus HSP70           | NP_034608.2       |
| 32      | Rattus norvegicus HSP70      | NP_001316825.1    |
| 33      | Danio rerio HSP70            | AAH56709.1        |
| 34      | Capra hircus HSP90           | XP_017921728.1    |

|    |                              |                |
|----|------------------------------|----------------|
| 35 | Ovis aries HSP90             | ABI99473.1     |
| 36 | Equus caballus HSP90         | NP_001157427.1 |
| 37 | Bos taurus HSP90             | NP_001012688.1 |
| 38 | Bubalus bubalis HSP90        | XP_025127285.1 |
| 39 | Camelus ferus HSP90          | XP_031310187.1 |
| 40 | Sus scrofa HSP90             | NP_999138.1    |
| 41 | Canis lupus familiaris HSP90 | XP_005623992.2 |
| 42 | Mus musculus HSP90           | NP_034610.1    |
| 43 | Rattus norvegicus HSP90      | NP_786937.1    |
| 44 | Danio rerio HSP90            | NP_571403.1    |
| 45 | Capra hircus HSPB            | XP_017896392.1 |
| 46 | Ovis aries HSPB              | XP_027817273.1 |
| 47 | Equus caballus HSPB          | XP_001504528.1 |
| 48 | Bos taurus HSPB              | NP_001020740.1 |
| 49 | Bubalus bubalis HSPB         | XP_006057191.1 |
| 50 | Camelus ferus HSPB           | XP_032315487.1 |
| 51 | Sus scrofa HSPB              | NP_001007519.1 |
| 52 | Canis lupus familiaris HSPB  | NP_001003295.2 |
| 53 | Mus musculus HSPB            | NP_038588.2    |
| 54 | Rattus norvegicus HSPB       | NP_114176.4    |
| 55 | Danio rerio HSPB             | NP_001008615.2 |
| 56 | Capra hircus HSPD            | XP_017916768.1 |
| 57 | Ovis aries HSPD              | XP_027820862.1 |
| 58 | Equus caballus HSPD          | XP_023478054.1 |
| 59 | Bos taurus HSPD              | NP_001160081.1 |
| 60 | Bubalus bubalis HSPD         | XP_006078223.1 |
| 61 | Camelus ferus HSPD           | XP_032336014.1 |
| 62 | Sus scrofa HSPD              | NP_001241645.1 |
| 63 | Canis lupus familiaris HSPD  | XP_022270952.1 |
| 64 | Mus musculus HSPD            | NP_034607.3    |
| 65 | Rattus norvegicus HSPD       | XP_006244994.1 |
| 66 | Danio rerio HSPD             | NP_851847.1    |
| 67 | Capra hircus HSPH1           | XP_017912110.1 |
| 68 | Ovis aries HSPH1             | XP_014953627.2 |
| 69 | Equus caballus HSPH1         | XP_001493567.1 |
| 70 | Bos taurus HSPH1             | NP_001068770.1 |
| 71 | Bubalus bubalis HSPH1        | XP_025118688.1 |
| 72 | Camelus ferus HSPH1          | XP_032352233.1 |
| 73 | Sus scrofa HSPH1             | XP_020920751.1 |

|    |                              |                |
|----|------------------------------|----------------|
| 74 | Canis lupus familiaris HSPH1 | XP_013962905.1 |
| 75 | Mus musculus HSPH1           | NP_001334463.1 |
| 76 | Rattus norvegicus HSPH1      | NP_001011901.1 |
| 77 | Danio rerio HSPH1            | XP_001919957.2 |

**Table S2.** Accession no. of buffalo HSP90

| Sr. No | Gene     | Accession Number |
|--------|----------|------------------|
| 1      | HSP90AA1 | XP_025127285.1   |
| 2      | HSP90AB1 | XP_006069362.2   |
| 3      | HSP90B1  | XP_006077264.1   |
| 4      | TRAP1    | XP_006054992.2   |

**Table S3.** Accession no. of buffalo HSP70

| Sr. No | Gene    | Accession Number |
|--------|---------|------------------|
| 1      | HSP70.1 | XP_006041955.2   |
| 2      | HSPA1L  | XP_006041950.1   |
| 3      | HSPA6   | XP_006041196.2   |
| 4      | HSPA8   | XP_006072590.1   |
| 5      | HSPA2   | XP_006072201.1   |
| 6      | HSP70   | XP_025120572.1   |
| 7      | HSPA14  | XP_006066069.1   |
| 8      | HSPA13  | XP_006078343.1   |
| 9      | HSPA4   | XP_006065134.1   |
| 10     | HSPA4L  | XP_025123823.1   |

**Table S4.** Accession no. of buffalo HSP40

| Sr. No | Gene    | Accession Number |
|--------|---------|------------------|
| 1      | DNAJA1  | XP_006066768.1   |
| 2      | DNAJA4  | XP_025127429.1   |
| 3      | DNAJA2  | XP_006062820.1   |
| 4      | DNAJB5  | XP_025137445.1   |
| 5      | DNAJB4  | XP_006068502.1   |
| 6      | DNAJB11 | XP_006058686.1   |
| 7      | DNAJB1  | XP_006066611.1   |
| 8      | DNAJB13 | XP_025122222.1   |
| 9      | DNAJA3  | XP_006054938.1   |
| 10     | DNAJB8  | XP_006078907.1   |
| 11     | DNAJB6  | XP_025147736.1   |

|    |         |                |
|----|---------|----------------|
| 12 | DNAJB12 | XP_006077137.2 |
| 13 | DNAJB2  | XP_006059040.1 |
| 14 | DNAJB3  | XP_006053793.1 |
| 15 | DNAJB9  | XP_006050765.1 |
| 16 | DNAJB14 | XP_006052550.1 |
| 17 | DNAJC5  | XP_025119663.1 |
| 18 | DNAJB7  | XP_025138593.1 |
| 19 | DNAJC5G | XP_006046244.2 |
| 20 | DNAJC5B | XP_025121114.1 |
| 21 | DNAJC18 | XP_006070872.1 |
| 22 | DNAJC21 | XP_006071958.1 |
| 23 | DNAJC16 | XP_006072848.2 |
| 24 | DNAJC10 | XP_006071841.1 |
| 25 | DNAJC17 | XP_006073122.1 |
| 26 | DNAJC3  | XP_006074344.1 |
| 27 | DNAJC30 | XP_006057157.2 |
| 28 | DNAJC11 | XP_006044303.1 |
| 29 | DNAJC1  | XP_025120211.1 |
| 30 | DNAJC7  | XP_006055827.1 |
| 31 | DNAJC4  | XP_025142383.1 |
| 32 | DNAJC14 | XP_006075140.1 |
| 33 | DNAJC24 | XP_006060883.1 |
| 34 | DNAJC9  | XP_006060667.1 |
| 35 | DNAJC27 | XP_006055128.1 |
| 36 | DNAJC25 | XP_006043444.2 |
| 37 | DNAJC13 | XP_025147498.1 |
| 38 | DNAJC12 | XP_006071587.1 |
| 39 | DNAJC15 | XP_025118814.1 |

**Table S5.** Accession no. of buffalo HSP family B, HSP10, HSPD and HSPH1

| Sr. No | Gene   | Accession Number |
|--------|--------|------------------|
| 1      | HSPB1  | XP_006057191.1   |
| 2      | HSPB2  | XP_025122686.1   |
| 3      | HSPB3  | XP_006074232.1   |
| 4      | HSPB6  | XP_006068849.1   |
| 5      | HSPB7  | XP_006066657.1   |
| 6      | HSPB8  | XP_006061021.1   |
| 7      | HSPB9  | XP_025135916.1   |
| 8      | HSPB11 | XP_006067277.1   |
| 9      | HSPD1  | XP_006078223.1   |

|    |       |                |
|----|-------|----------------|
| 10 | HSP10 | XP_006078224.1 |
| 11 | HSPH1 | XP_025118688.1 |

**Table S6.** Mutations in coding region of HSP gene family in buffalo

| Gene            | Nucleotide variation | Amino acid change | Mutation type  |
|-----------------|----------------------|-------------------|----------------|
| <b>HSP90AA1</b> | T108>G               | T36               | Synonymous     |
|                 | C166>T               | L56               | Synonymous     |
|                 | C201>A               | P67               | Synonymous     |
|                 | T213>C               | D71               | Synonymous     |
|                 | C240>A               | L80               | Synonymous     |
|                 | A516>G               | V172              | Synonymous     |
|                 | C768>T               | P256              | Synonymous     |
|                 | T930>C               | Y310              | Synonymous     |
|                 | T978>G               | A326              | Synonymous     |
|                 | T1059>C              | F353              | Synonymous     |
|                 | C1125>T              | C375              | Synonymous     |
|                 | T1185>C              | L395              | Synonymous     |
|                 | G1518>A              | S506              | Synonymous     |
|                 | C1575>A              | P525              | Synonymous     |
|                 | T1656G               | L552              | Synonymous     |
|                 | G1746>A              | K582              | Synonymous     |
|                 | T1800>C              | I600              | Synonymous     |
|                 | G1851>T              | A617              | Synonymous     |
|                 | T2121>G              | D707>E            | Non-Synonymous |
|                 | A2154>G              | P718              | Synonymous     |
| <b>HSP90AB1</b> | A2163>G              | E721              | Synonymous     |
|                 | A2166>G              | G722              | Synonymous     |
|                 | A2193>G              | E731              | Synonymous     |
|                 | A153>G               | L51               | Synonymous     |
|                 | G336>A               | A112              | Synonymous     |
|                 | G567>A               | Q189              | Synonymous     |
|                 | C1158>T              | L386              | Synonymous     |
|                 | A1260>G              | A420              | Synonymous     |
|                 | A1284>G              | K428              | Synonymous     |
|                 | T1290>C              | A430              | Synonymous     |
|                 | G1296>A              | A432              | Synonymous     |
|                 | C1308>T              | N436              | Synonymous     |
|                 | G1314>A              | K438              | Synonymous     |
|                 | G1437>C              | T479              | Synonymous     |

|                |         |       |                |
|----------------|---------|-------|----------------|
|                | T1491>C | S497  | Synonymous     |
|                | A1542>G | T514  | Synonymous     |
|                | C1575>G | L525  | Synonymous     |
|                | A1599>G | L533  | Synonymous     |
|                | T1638>C | D546  | Synonymous     |
|                | T1752>C | L584  | Synonymous     |
|                | C1788>T | Y596  | Synonymous     |
|                | T1875>C | H625  | Synonymous     |
|                | T2070>C | I690  | Synonymous     |
|                | G2082>A | E694  | Synonymous     |
|                | T2103>C | S701  | Synonymous     |
| <b>HSP90B1</b> | C69>T   | D23   | Synonymous     |
|                | T438>C  | H146  | Synonymous     |
|                | A510>G  | G170  | Synonymous     |
|                | A564>G  | T188  | Synonymous     |
|                | C576>T  | I192  | Synonymous     |
|                | T600>C  | Y200  | Synonymous     |
|                | A660>G  | Q220  | Synonymous     |
|                | T699>C  | I233  | Synonymous     |
|                | C858>T  | T286  | Synonymous     |
|                | T879>C  | A293  | Synonymous     |
|                | T1218>C | S406  | Synonymous     |
|                | C1260>T | D420  | Synonymous     |
|                | C1548>T | H516  | Synonymous     |
|                | C1647>T | A549  | Synonymous     |
|                | C1752>T | D584  | Synonymous     |
|                | G2187>A | L729  | Synonymous     |
|                | T2289>C | P763  | Synonymous     |
|                | T2310>C | T770  | Synonymous     |
|                | C2361>T | D787  | Synonymous     |
| <b>TRP1</b>    | G9>C    | R3    | Synonymous     |
|                | T20>C   | M7>T  | Non-Synonymous |
|                | G30>T   | L10   | Synonymous     |
|                | G32>C   | W11>S | Non-Synonymous |
|                | G33>T   | W11>S | Non-Synonymous |
|                | G73>A   | G25>R | Non-Synonymous |
|                | C117>T  | S39   | Synonymous     |
|                | C128>G  | P43>R | Non-Synonymous |
|                | T230>C  | L77>S | Non-Synonymous |
|                | C236>T  | A79>V | Non-Synonymous |



|                |         |        |                |
|----------------|---------|--------|----------------|
|                | T237>C  | A79>V  | Non-Synonymous |
|                | C288>G  | L96    | Synonymous     |
|                | G355>T  | A119>S | Non-Synonymous |
|                | C429>T  | H143   | Synonymous     |
|                | G555>A  | A185   | Synonymous     |
|                | G570>A  | A190   | Synonymous     |
|                | G660>C  | S220   | Synonymous     |
|                | G732>A  | S244   | Synonymous     |
|                | T837>C  | F279   | Synonymous     |
|                | T879>C  | T293   | Synonymous     |
|                | G916>A  | G306>S | Non-Synonymous |
|                | C918>T  | G306>S | Non-Synonymous |
|                | T951>C  | V317   | Synonymous     |
|                | G996>A  | T332   | Synonymous     |
|                | C1142>T | T381>M | Non-Synonymous |
|                | C1277>T | T426>I | Non-Synonymous |
|                | G1313>A | R438>K | Non-Synonymous |
|                | C1389>T | I463   | Synonymous     |
|                | G1392>A | A464   | Synonymous     |
|                | T1428>C | A476   | Synonymous     |
|                | T1447>C | S483>P | Non-Synonymous |
|                | G1449>A | S483>P | Non-Synonymous |
|                | C1455>T | Y485   | Synonymous     |
|                | C1473>T | A491   | Synonymous     |
|                | T1500>C | C500   | Synonymous     |
|                | G1521>A | A507   | Synonymous     |
|                | A1653>G | T551   | Synonymous     |
|                | C1703   | P568   | Indel          |
|                | A1704   | P568   | Indel          |
|                | G1705   | A569   | Indel          |
|                | T1714>C | C572>R | Non-Synonymous |
|                | T1761>C | N587   | Synonymous     |
|                | G1764>A | A588   | Synonymous     |
|                | G1830>A | T610   | Synonymous     |
|                | T1848>C | A616   | Synonymous     |
|                | A1938>G | R646   | Synonymous     |
|                | G2085>T | L695   | Synonymous     |
| <b>HSP70.1</b> | G156>C  | G52    | Synonymous     |
|                | A237>C  | G79    | Synonymous     |
|                | C282>G  | V94    | Synonymous     |

|               |         |        |                 |
|---------------|---------|--------|-----------------|
|               | A324>G  | K108   | Synonymous      |
|               | C393>G  | A131   | Synonymous      |
|               | A603>C  | G201   | Synonymous      |
|               | A798>G  | A266   | Synonymous      |
|               | A816>G  | R272   | Synonymous      |
|               | C930>T  | F310   | Synonymous      |
|               | G951>A  | V317   | Synonymous      |
|               | G960>T  | A320   | Synonymous      |
|               | T1177>C | L393   | Synonymous      |
|               | G1581>A | A527   | Synonymous      |
|               | G1632>T | S544   | Synonymous      |
|               | C1746>T | D582   | Synonymous      |
|               | T1866>C | F622   | Synonymous      |
|               | G1877>C | G626>A | Non- Synonymous |
| <b>HSPA1L</b> | A9>G    | A3     | Synonymous      |
|               | T24>C   | A8     | Synonymous      |
|               | T57>C   | C19    | Synonymous      |
|               | G60>A   | V20    | Synonymous      |
|               | A72>G   | Q24    | Synonymous      |
|               | C129>T  | Y43    | Synonymous      |
|               | T141>C  | T47    | Synonymous      |
|               | A288>G  | V96    | Synonymous      |
|               | A357>G  | E119   | Synonymous      |
|               | G489>A  | A163   | Synonymous      |
|               | C660>T  | E220   | Synonymous      |
|               | A738>G  | E246   | Synonymous      |
|               | G1029>T | T343   | Synonymous      |
|               | G1149>A | M383>A | Non- Synonymous |
|               | G1195>T | A399>S | Non- Synonymous |
|               | T1243>C | L415   | Synonymous      |
|               | T1299>C | Y433   | Synonymous      |
|               | T1356>G | T452   | Synonymous      |
|               | T1422>C | G474   | Synonymous      |
|               | C1470>A | V490   | Synonymous      |
|               | C1650>T | N550   | Synonymous      |
|               | T1742>C | L581>S | Non- Synonymous |
| <b>HSPA6</b>  | T69>C   | F23    | Synonymous      |
|               | A237>G  | R79    | Synonymous      |
|               | T250>A  | S84>T  | Non- Synonymous |
|               | T348>C  | F116   | Synonymous      |

|              |         |        |                 |
|--------------|---------|--------|-----------------|
|              | A519>G  | R173   | Synonymous      |
|              | C756>G  | G252   | Synonymous      |
|              | C894>T  | S298   | Synonymous      |
|              | T936>C  | F312   | Synonymous      |
|              | A957>G  | V319   | Synonymous      |
|              | C972>G  | R324   | Synonymous      |
|              | G1069>A | D357>N | Non- Synonymous |
|              | A1143>G | V381   | Synonymous      |
|              | T1179>G | L393   | Synonymous      |
|              | G1209>A | L403   | Synonymous      |
|              | T1335>C | Y445   | Synonymous      |
|              | G1709>A | R570>H | Non- Synonymous |
|              | T1855>C | S619>P | Non- Synonymous |
|              | C1878>T | A626   | Synonymous      |
|              | C1917>T | I639   | Synonymous      |
| <b>HSPA8</b> | C63>T   | F21    | Synonymous      |
|              | G147>A  | R49    | Synonymous      |
|              | A150>G  | L50    | Synonymous      |
|              | A162>T  | A54    | Synonymous      |
|              | A165>C  | A55    | Synonymous      |
|              | A360>T  | S120   | Synonymous      |
|              | C429>T  | V143   | Synonymous      |
|              | C504>T  | N168   | Synonymous      |
|              | A538>G  | T180>A | Non- Synonymous |
|              | C582>T  | N194   | Synonymous      |
|              | G603>T  | G201   | Synonymous      |
|              | A660>G  | K220   | Synonymous      |
|              | T714>C  | V238   | Synonymous      |
|              | G729>A  | A243   | Synonymous      |
|              | G804>A  | E268   | Synonymous      |
|              | A975>G  | K325   | Synonymous      |
|              | T1026>C | R342   | Synonymous      |
|              | T1254>C | T418   | Synonymous      |
|              | C1317>T | L439   | Synonymous      |
|              | G1386>A | T462   | Synonymous      |
|              | C1575>T | Y525   | Synonymous      |
|              | C1602>T | D534   | Synonymous      |
|              | T1611>C | S537   | Synonymous      |
|              | G1623>A | S541   | Synonymous      |
|              | C1635>T | Y545   | Synonymous      |

|              |         |        |                 |
|--------------|---------|--------|-----------------|
|              | G1695>A | E565   | Synonymous      |
|              | T1893>A | G631   | Synonymous      |
| <b>HSPA2</b> | C33>T   | D11    | Synonymous      |
|              | C48>T   | Y16    | Synonymous      |
|              | G159>C  | G53    | Synonymous      |
|              | A160>G  | T54>D  | Non- Synonymous |
|              | C161>A  | T54>D  | Non- Synonymous |
|              | G312>A  | V104   | Synonymous      |
|              | C537>G  | A179   | Synonymous      |
|              | C540>G  | A180   | Synonymous      |
|              | T555>C  | G185   | Synonymous      |
|              | T681>C  | G227   | Synonymous      |
|              | T730>C  | W244>L | Non- Synonymous |
|              | G731>T  | W244>L | Non- Synonymous |
|              | G775>A  | N259   | Synonymous      |
|              | C776>A  | N259   | Synonymous      |
|              | C777    | N259   | Indel           |
|              | A778    | K260   | Indel           |
|              | A779    | K260   | Indel           |
|              | G780    | K260   | Indel           |
|              | C781    | R261   | Indel           |
|              | G782    | R261   | Indel           |
|              | C783    | R261   | Indel           |
|              | G784    | A262   | Indel           |
|              | C785    | A262   | Indel           |
|              | G786    | A262   | Indel           |
|              | G787    | V263   | Indel           |
|              | T788    | V263   | Indel           |
|              | G789    | V263   | Indel           |
|              | C790    | R264   | Indel           |
|              | G791    | R264   | Indel           |
|              | A814>C  | R272   | Synonymous      |
|              | G816>T  | R272   | Synonymous      |
|              | T894>G  | T298   | Synonymous      |
|              | T944>G  | V315>G | Non- Synonymous |
|              | A945>G  | V315>G | Non- Synonymous |
|              | C946>A  | P316>T | Non- Synonymous |
|              | T1107>C | D369   | Synonymous      |
|              | A1113>G | A371   | Synonymous      |
|              | T1152>C | I384   | Synonymous      |

|              |         |        |                 |
|--------------|---------|--------|-----------------|
|              | T1170>C | N390   | Synonymous      |
|              | G1533>T | G511   | Synonymous      |
|              | T1534>C | C512>R | Non- Synonymous |
|              | A1575>G | A525   | Synonymous      |
|              | T1650>C | Y550   | Synonymous      |
|              | C1848>T | G616   | Synonymous      |
|              | C1881>T | S627   | Synonymous      |
| <b>HSP70</b> | G25>A   | V9>I   | Non- Synonymous |
|              | A156>C  | G52    | Synonymous      |
|              | G183>C  | L61    | Synonymous      |
|              | A220>C  | I74>L  | Non- Synonymous |
|              | C265>G  | H89>E  | Non- Synonymous |
|              | C267>G  | H89>E  | Non- Synonymous |
|              | A316>C  | S106>R | Non- Synonymous |
|              | G324>A  | K108   | Synonymous      |
|              | A373>C  | T125>P | Non- Synonymous |
|              | A382>C  | K128>H | Non- Synonymous |
|              | G384>C  | K128>H | Non- Synonymous |
|              | G489>C  | V163   | Synonymous      |
|              | A502>T  | N168>Y | Non- Synonymous |
|              | A511>G  | R171>G | Non- Synonymous |
|              | A658>C  | K220>Q | Non- Synonymous |
|              | G689>A  | G230>E | Non- Synonymous |
|              | A704>G  | N235>S | Non- Synonymous |
|              | A715>G  | N239>D | Non- Synonymous |
|              | A781>C  | R261   | Synonymous      |
|              | G865>C  | E289>Q | Non- Synonymous |
|              | G898>T  | A300>S | Non- Synonymous |
|              | G942>A  | L314   | Synonymous      |
|              | A995>G  | H332>R | Non- Synonymous |
|              | C1062>A | F354>L | Non- Synonymous |
|              | C1086>A | S362>R | Non- Synonymous |
|              | G1140>A | L380   | Synonymous      |
|              | G1146>C | G382   | Synonymous      |
|              | A1240>G | I414>V | Non- Synonymous |
|              | A1318>G | V438   | Synonymous      |
|              | A1383>G | L461   | Synonymous      |
|              | G1428>C | V476   | Synonymous      |
|              | A1459>T | N487>Y | Non- Synonymous |
|              | A1531>G | S511>G | Non- Synonymous |

|               |         |        |                 |
|---------------|---------|--------|-----------------|
|               | C1593>G | V531   | Synonymous      |
|               | T1737>C | S579   | Synonymous      |
|               | C1746>T | D582   | Synonymous      |
|               | T1761>G | A587   | Synonymous      |
|               | T1866>C | F622   | Synonymous      |
|               | G1877>C | G626>A | Non- Synonymous |
| <b>HSPA14</b> | G255>A  | T85    | Synonymous      |
|               | T295>C  | L99    | Synonymous      |
|               | G307>A  | D103>N | Non- Synonymous |
|               | G519>A  | P173   | Synonymous      |
|               | G552>A  | Q184   | Synonymous      |
|               | C686>T  | T229>I | Non- Synonymous |
|               | C715>T  | L239   | Synonymous      |
|               | T723>A  | L241   | Synonymous      |
| <b>HSPA13</b> | G123>C  | T41    | Synonymous      |
|               | C228>T  | D76    | Synonymous      |
|               | C519>T  | S173   | Synonymous      |
|               | A582>C  | G194   | Synonymous      |
|               | C615>A  | T205   | Synonymous      |
|               | T681>C  | G227   | Synonymous      |
|               | A708>G  | L236   | Synonymous      |
|               | G783>A  | Q261   | Synonymous      |
|               | A861>C  | R287   | Synonymous      |
|               | A919>T  | M307>L | Non- Synonymous |
|               | C928>T  | M310   | Synonymous      |
|               | A988>G  | K330>E | Non- Synonymous |
|               | T997>C  | F333>L | Non- Synonymous |
|               | A1004>C | Q335>P | Non- Synonymous |
|               | A1009>G | N337>D | Non- Synonymous |
|               | C1029>T | S343   | Synonymous      |
|               | A1030>G | M344>V | Non- Synonymous |
|               | A1047>T | L349   | Synonymous      |
|               | A1060>C | N354>R | Non- Synonymous |
|               | A1061>G | N354>R | Non- Synonymous |
|               | C1113>T | D371   | Synonymous      |
|               | A1114>G | T372>A | Non- Synonymous |
|               | T1146>C | L382   | Synonymous      |
|               | C1152>T | P384   | Synonymous      |
| <b>HSPA4</b>  | G429>A  | S143   | Synonymous      |
|               | A469>G  | M157>V | Non- Synonymous |

|               |         |        |                 |
|---------------|---------|--------|-----------------|
|               | C684>T  | D228   | Synonymous      |
|               | A951>G  | V317   | Synonymous      |
|               | A960>G  | P320   | Synonymous      |
|               | C1104>T | A368   | Synonymous      |
|               | C1116>T | V372   | Synonymous      |
|               | A1194>G | V398   | Synonymous      |
|               | A1452>G | V484   | Synonymous      |
|               | G2123>A | Q708   | Synonymous      |
|               | C2269>T | L757   | Synonymous      |
|               | T2375>C | L792>P | Non- Synonymous |
|               | A2475>G | A825   | Synonymous      |
| <b>HSPA4L</b> | T45>C   | I15    | Synonymous      |
|               | A633>G  | S211   | Synonymous      |
|               | G678>C  | T226   | Synonymous      |
|               | A984>T  | A328   | Synonymous      |
|               | T1197>C | P399   | Synonymous      |
|               | G1349>A | R450>H | Non- Synonymous |
|               | G1521>C | Q507>H | Non- Synonymous |
|               | T1530>C | V510   | Synonymous      |
|               | C1531>G | P511>A | Non- Synonymous |
|               | C1667>A | T556>N | Non- Synonymous |
|               | C1791>T | L597   | Synonymous      |
|               | C1944>T | D648   | Synonymous      |
|               | C2221>T | H741>Y | Non- Synonymous |
|               | A2316>C | I772   | Synonymous      |
|               | C2337>G | L779   | Synonymous      |
|               | C2355>T | P785   | Synonymous      |
|               | G2414>A | S805>N | Non- Synonymous |
|               | C2424>T | N808   | Synonymous      |

**Publisher's Note:** MDPI stays neutral with regard to jurisdictional claims in published maps and institutional affiliations.

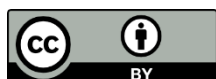

© 2020 by the authors. Licensee MDPI, Basel, Switzerland. This article is an open access article distributed under the terms and conditions of the Creative Commons Attribution (CC BY) license (<http://creativecommons.org/licenses/by/4.0/>).
